# Supplementary material for: Spiropyran-decorated light-responsive amphiphilic poly(α-hydroxy acids) micelles constructed via a CuAAC reaction
Source: Royal Society of Chemistry journal article supplement (doi:10.1039/c4ra11550c), 2014-01-01
Supplement: c4ra11550c1.pdf [file c4ra11550c1.pdf]

**Supplemental Information for “Spiropyran-decorated light-responsive amphiphilic poly( $\alpha$ -hydroxy acids) micelles constructed via CuAAC reaction”**

Yile Niu, Yefei Li, Yanbing Lu\*, and Weijian Xu

Institute of Polymer Science and Engineering, College of Chemistry & Chemical Engineering, Hunan University, Changsha 410082, China

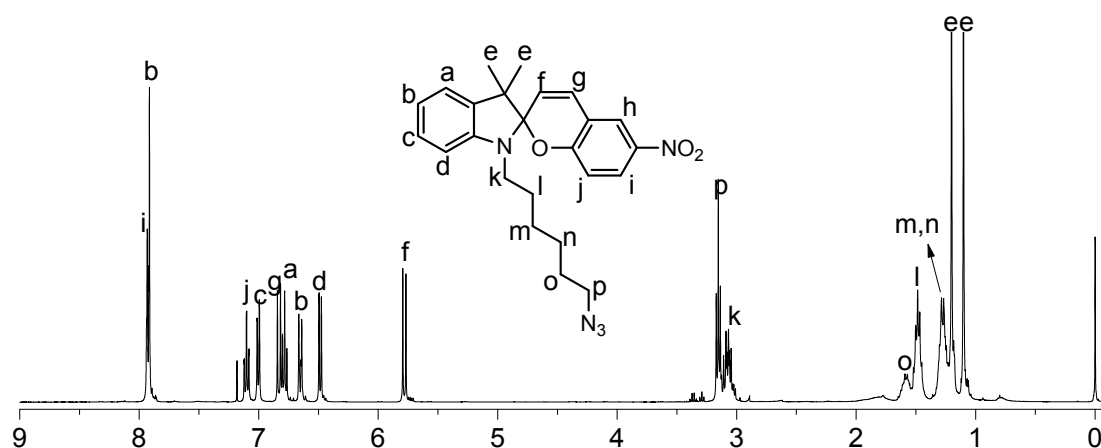

**Figure S1** <sup>1</sup>H NMR spectrum of SP-N<sub>3</sub>

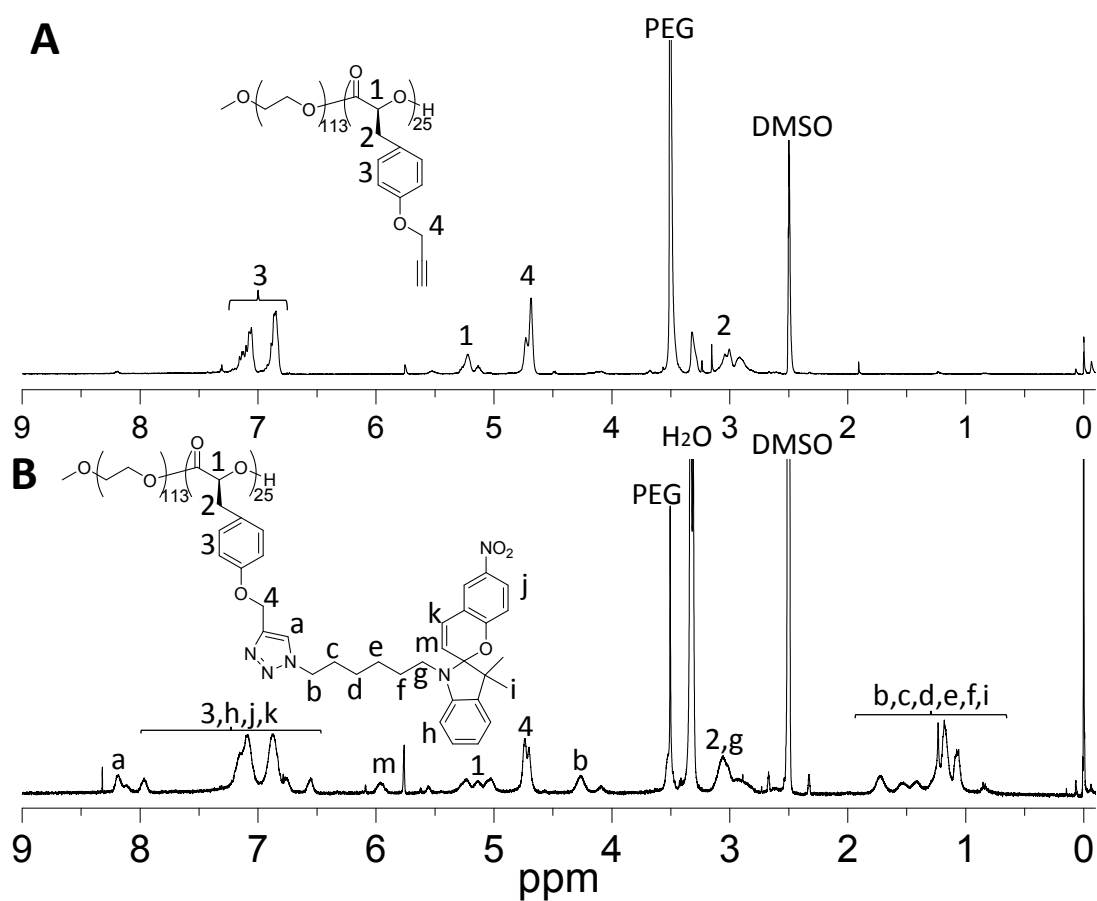

**Figure S2**  $^1\text{H}$  NMR spectra of mPEG-b-Poly(Tyr)<sub>25</sub> (A) and mPEG-b-Poly(Tyr)<sub>25</sub>-SP (B).

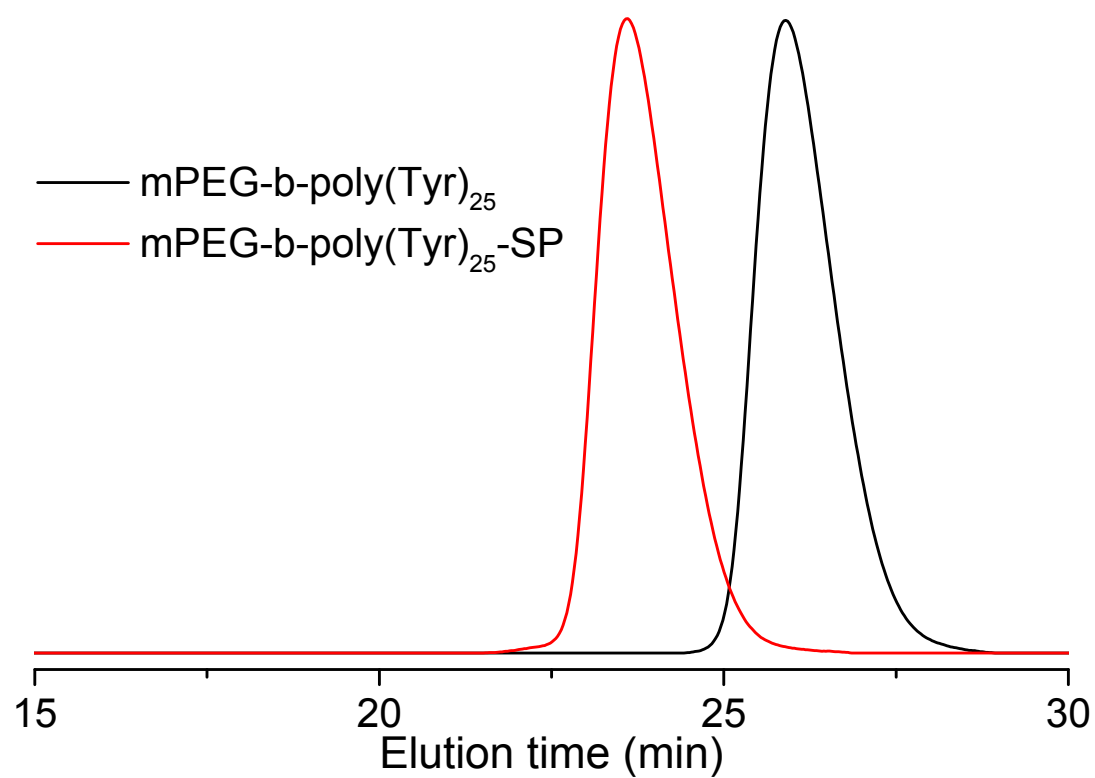

**Figure S3** GPC curves of mPEG-b-Poly(Tyr)<sub>25</sub> and mPEG-b-Poly(Tyr)<sub>25</sub>-SP.
